# Supplementary material for: Comparative Genomics of Acetic Acid Bacteria within the Genus Bombella in Light of Beehive Habitat Adaptation
Source: MDPI journal article supplement (doi:10.3390/microorganisms10051058), 2022-05-20
Supplement: s1 [file s1]

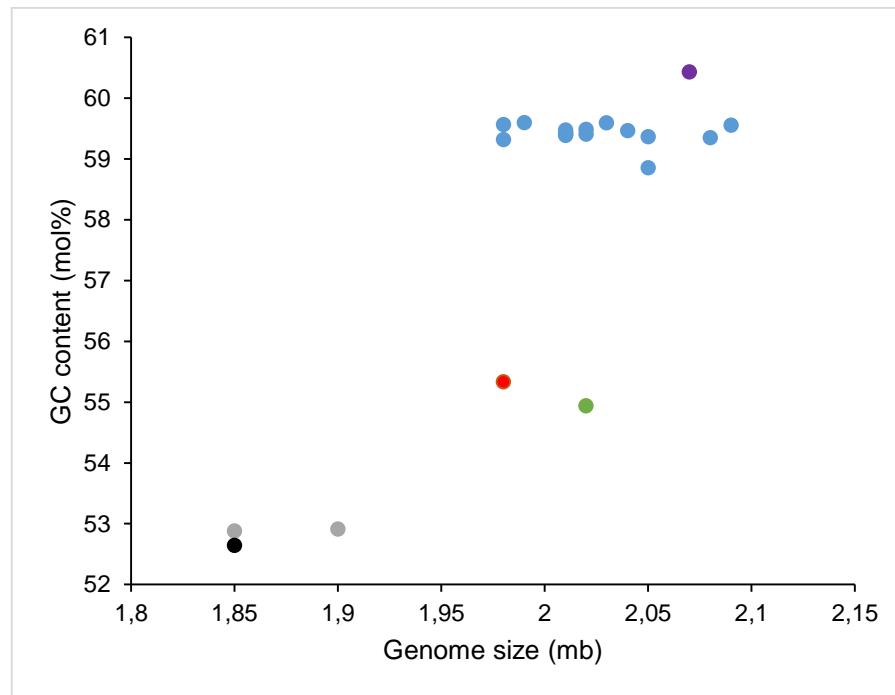

**Figure S1:** Visualization of the genomic G+C content (mol%) over the genome size (mb) of *Bombella* genomes. Black dot: *Bombella* sp. AS1; Grey dots: *Bombella* sp. ESL0378 / ESL 0385; Red dot: *Bombella favorum*; Green dot: *Bombella intestini*; Blue dots: *Bombella apis*; Purple dot: *Bombella mellum*.
