# Supplementary material for: Comparative Genomics of Acetic Acid Bacteria within the Genus Bombella in Light of Beehive Habitat Adaptation
Source: MDPI journal article supplement (doi:10.3390/microorganisms10051058), 2022-05-20
Supplement: s1 [file s1]

**Table S3:** Genome accessions for contigs of type 1 polyketide synthase gene clusters

|                                                 | <b>T1PKS Contig</b> |
|-------------------------------------------------|---------------------|
| <i>Bombella apis</i> MRM1 <sup>T</sup>          | JADAQV0000000004    |
| <i>Bombella apis</i> ESL0368                    | CP046394.1          |
| <i>Bombella apis</i> ESL0380                    | WNIH01000008.1      |
| <i>Bombella apis</i> ESL0387                    | WNIK01000007.1      |
| <i>Bombella apis</i> SME1                       | WHNS01000005.1      |
| <i>Bombella apis</i> TMW 2.1882                 | NWUT03              |
| <i>Bombella apis</i> TMW 2.1884                 | QORR02              |
| <i>Bombella apis</i> TMW 2.1886                 | QORS05              |
| <i>Bombella apis</i> TMW 2.1888                 | CP030979            |
| <i>Bombella apis</i> TMW 2.1890                 | NWUV03              |
| <i>Bombella apis</i> TMW 2.1891                 | QORT03              |
| <i>Bombella intestini</i> R52487 <sup>T</sup>   | NZ_JATM01000004     |
| <i>Bombella</i> sp. ESL0378                     | NZ_WNIF01000010     |
| <i>Bombella</i> sp. ESL0385                     | NZ_WNIJ01000001     |
| <i>Bombella favorum</i> TMW 2.1880 <sup>T</sup> | NWUS03              |
| <i>Bombella mellum</i> TMW 2.1889 <sup>T</sup>  | PDLY04              |
| <i>Bombella apis</i> A29                        | NZ_LMYH01000013     |
| <i>Bombella apis</i> AM169                      | NZ_CBLY01000004     |
| <i>Bombella</i> sp. AS1                         | NZ_MEJG01000002     |
| <i>Bombella apis</i> G773c                      | NZ_CP020554.1       |
| <i>Bombella apis</i> 3A1                        | NZ_MNPT01000004     |
| <i>Bombella apis</i> M18                        | NZ_MNPS01000003     |
| <i>Saccharibacter floricola</i> DSM 15669       | NZ_KB899335.1       |
| <i>Gluconacetobacter diazotrophicus</i> PA1 5   | CP001189.1          |
| <i>Asaia bogorensis</i> NBRC 16594              | NZ_AP014690.1       |
