# Supplementary material for: Comparative Genomics of Acetic Acid Bacteria within the Genus Bombella in Light of Beehive Habitat Adaptation
Source: MDPI journal article supplement (doi:10.3390/microorganisms10051058), 2022-05-20
Supplement: s1 [file s1]

**Table S4:** Growth inhibition zone diameter (in mm) of antibiotic disc diffusion assay.

|                                                           | <b>Tetracycline<br/>30</b> | <b>Doxycycline<br/>30</b> | <b>Ampicillin 10</b> | <b>Penicillin G 5</b> | <b>Chloramphenicol 30</b> | <b>Kanamycin<br/>30</b> | <b>Ciprofloxacin 5</b> | <b>Meropenem<br/>10</b> | <b>Cephazolin<br/>30</b> | <b>Norofloxacin<br/>10</b> | <b>Trimethoprim 5</b> | <b>Tobramycin<br/>30</b> |
|-----------------------------------------------------------|----------------------------|---------------------------|----------------------|-----------------------|---------------------------|-------------------------|------------------------|-------------------------|--------------------------|----------------------------|-----------------------|--------------------------|
| <b><i>Bombella favorum</i><br/>TMW 2.1880<sup>T</sup></b> | 36                         | 31                        | 6                    | X                     | 10                        | 13                      | 6                      | 22                      | X                        | X                          | X                     | 11                       |
| <b><i>Bombella mellum</i><br/>TMW 2.1889<sup>T</sup></b>  | 28                         | 25                        | 9                    | X                     | 8                         | 11                      | 6                      | 23                      | X                        | X                          | X                     | 8                        |
| <b><i>Bombella apis</i><br/>TMW 2.1882</b>                | 27                         | 23                        | 7                    | X                     | 9                         | 11                      | 6                      | 19                      | X                        | X                          | X                     | 10                       |
| <b><i>Bombella apis</i><br/>TMW 2.1884</b>                | 31                         | 29                        | 11                   | X                     | 18                        | 11                      | X                      | 23                      | X                        | X                          | X                     | 10                       |
| <b><i>Bombella apis</i><br/>TMW 2.1886</b>                | 29                         | 25                        | 10                   | X                     | 12                        | 10                      | 7                      | 22                      | X                        | X                          | X                     | 9                        |
| <b><i>Bombella apis</i><br/>TMW 2.1888</b>                | 33                         | 28                        | 6                    | X                     | 13                        | 13                      | X                      | 24                      | X                        | X                          | X                     | 10                       |
| <b><i>Bombella apis</i><br/>TMW 2.1890</b>                | 30                         | 24                        | 7                    | X                     | 14                        | 11                      | X                      | 23                      | X                        | X                          | X                     | 7                        |
| <b><i>Bombella apis</i><br/>TMW 2.1891</b>                | 30                         | 27                        | 7                    | X                     | 9                         | 12                      | X                      | 21                      | X                        | X                          | X                     | 8                        |
| <b><i>Bombella apis</i><br/>MRM1<sup>T</sup></b>          | X                          | X                         | 7                    | X                     | 14                        | 10                      | X                      | 18                      | X                        | X                          | X                     | 9                        |
| <b><i>Gluconobacter<br/>oxydans</i><br/>DSM46615</b>      | 25                         | 23                        | X                    | X                     | X                         | 10                      | X                      | 22                      | X                        | X                          | X                     | 14                       |
