# Supplementary material for: Comparative Genomics of Acetic Acid Bacteria within the Genus Bombella in Light of Beehive Habitat Adaptation
Source: MDPI journal article supplement (doi:10.3390/microorganisms10051058), 2022-05-20
Supplement: s1 [file s1]

**Table S1:** *In silico* DDH distances of analyzed *Bombella* genomes

|                              |                                | Formula 1 |                |          |                  | Formula 2 |                |          |                  | Formula 3 |                |          | G+C difference   |
|------------------------------|--------------------------------|-----------|----------------|----------|------------------|-----------|----------------|----------|------------------|-----------|----------------|----------|------------------|
| Query genome                 | Reference genome               | DDH       | Model C.I.     | Distance | Prob. DDH >= 70% | DDH       | Model C.I.     | Distance | Prob. DDH >= 70% | DDH       | Model C.I.     | Distance | Prob. DDH >= 70% |
| Bombella_apis_30666T         | Bombella_apis_ESL0368          | 97.2      | [95.6 - 98.2%] | 0.0357   | 99.09            | 94        | [92.3 - 95.4%] | 0.0077   | 96.97            | 98.1      | [97 - 98.8%]   | 0.0431   | 99.94            |
| Bombella_apis_30666T         | Bombella_apis_ESL0380          | 96.3      | [94.4 - 97.6%] | 0.0423   | 98.93            | 94.6      | [92.9 - 95.9%] | 0.0071   | 97.1             | 97.6      | [96.3 - 98.4%] | 0.0491   | 99.93            |
| Bombella_apis_30666T         | Bombella_apis_ESL0387          | 92.6      | [89.8 - 94.7%] | 0.0661   | 98.1             | 93.9      | [92.1 - 95.3%] | 0.0079   | 96.93            | 95        | [93 - 96.4%]   | 0.0734   | 99.83            |
| Bombella_apis_30666T         | Bombella_apis_SME1             | 92.8      | [90 - 94.9%]   | 0.0649   | 98.15            | 93.4      | [91.5 - 94.9%] | 0.0084   | 96.8             | 95        | [93.1 - 96.5%] | 0.0728   | 99.84            |
| Bombella_apis_30666T         | Bombella_apis_TMW21882         | 93.7      | [91.1 - 95.6%] | 0.0595   | 98.38            | 94.2      | [92.4 - 95.5%] | 0.0075   | 97.01            | 95.8      | [94 - 97%]     | 0.0666   | 99.87            |
| Bombella_apis_30666T         | Bombella_apis_TMW21884         | 94.7      | [92.3 - 96.4%] | 0.0534   | 98.6             | 93.8      | [91.9 - 95.2%] | 0.008    | 96.9             | 96.4      | [94.8 - 97.5%] | 0.061    | 99.89            |
| Bombella_apis_30666T         | Bombella_apis_TMW21886         | 94.1      | [91.5 - 95.9%] | 0.0573   | 98.46            | 94.2      | [92.4 - 95.5%] | 0.0076   | 97               | 96        | [94.3 - 97.2%] | 0.0644   | 99.88            |
| Bombella_apis_30666T         | Bombella_apis_TMW21888         | 97.8      | [96.4 - 98.6%] | 0.031    | 99.19            | 94.2      | [92.5 - 95.6%] | 0.0075   | 97.02            | 98.5      | [97.5 - 99%]   | 0.0382   | 99.95            |
| Bombella_apis_30666T         | Bombella_apis_TMW21890         | 94.8      | [92.5 - 96.5%] | 0.0525   | 98.63            | 93.8      | [91.9 - 95.2%] | 0.008    | 96.9             | 96.5      | [94.9 - 97.6%] | 0.0601   | 99.9             |
| Bombella_apis_30666T         | Bombella_apis_TMW21891         | 96.8      | [95 - 97.9%]   | 0.0388   | 99.02            | 94.1      | [92.4 - 95.5%] | 0.0076   | 96.99            | 97.8      | [96.7 - 98.6%] | 0.0461   | 99.94            |
| Bombella_apis_30666T         | Parasaccharibacter_apium_A29   | 93.7      | [91.1 - 95.6%] | 0.0593   | 98.38            | 94.3      | [92.5 - 95.6%] | 0.0074   | 97.03            | 95.8      | [94.1 - 97%]   | 0.0663   | 99.87            |
| Bombella_apis_30666T         | Parasaccharibacter_apium_AM169 | 95.3      | [93.1 - 96.9%] | 0.0492   | 98.73            | 93.7      | [91.8 - 95.1%] | 0.0081   | 96.88            | 96.8      | [95.3 - 97.8%] | 0.057    | 99.91            |
| Bombella_apis_30666T         | Parasaccharibacter_apium_G773c | 94        | [91.5 - 95.9%] | 0.0575   | 98.45            | 94.6      | [93 - 95.9%]   | 0.007    | 97.12            | 96        | [94.4 - 97.2%] | 0.0641   | 99.88            |
| Bombella_apis_30666T         | Saccharibacter_sp_3A1          | 95.4      | [93.2 - 96.9%] | 0.0486   | 98.75            | 93.7      | [91.9 - 95.2%] | 0.0081   | 96.89            | 96.9      | [95.4 - 97.9%] | 0.0563   | 99.91            |
| Bombella_apis_30666T         | Saccharibacter_sp_M18          | 94        | [91.5 - 95.8%] | 0.0577   | 98.45            | 89.6      | [87.2 - 91.5%] | 0.0126   | 95.65            | 95.4      | [93.6 - 96.8%] | 0.0696   | 99.86            |
|                              |                                | Formula 1 |                |          |                  | Formula 2 |                |          |                  | Formula 3 |                |          | G+C difference   |
| Query genome                 | Reference genome               | DDH       | Model C.I.     | Distance | Prob. DDH >= 70% | DDH       | Model C.I.     | Distance | Prob. DDH >= 70% | DDH       | Model C.I.     | Distance | Prob. DDH >= 70% |
| Bombella_sp_ESL0385          | Bombella_apis_30666T           | 20.7      | [17.5 - 24.3%] | 0.6926   | 0                | 18.7      | [16.5 - 21%]   | 0.2357   | 0                | 19.6      | [16.9 - 22.6%] | 0.765    | 0                |
| Bombella_sp_ESL0385          | Bombella_intestini_R52487      | 21.5      | [18.3 - 25.1%] | 0.6737   | 0                | 19.1      | [16.9 - 21.5%] | 0.2299   | 0                | 20.2      | [17.5 - 23.3%] | 0.7487   | 0                |
| Bombella_sp_ESL0385          | Bombella_sp_nov_TMW21880       | 22.4      | [19.2 - 26.1%] | 0.6518   | 0                | 18.9      | [16.7 - 21.3%] | 0.2325   | 0                | 20.9      | [18.1 - 23.9%] | 0.7328   | 0                |
| Bombella_sp_ESL0385          | Bombella_sp_nov_TMW21889       | 20.4      | [17.2 - 24%]   | 0.7011   | 0                | 18.7      | [16.5 - 21.1%] | 0.2353   | 0                | 19.3      | [16.6 - 22.4%] | 0.7715   | 0                |
| Bombella_sp_ESL0385          | Parasaccharibacter_apium_AS1   | 95.3      | [93.1 - 96.9%] | 0.0491   | 98.74            | 47.4      | [44.8 - 50%]   | 0.078    | 12.69            | 87.8      | [84.9 - 90.3%] | 0.1233   | 99.06            |
|                              |                                | Formula 1 |                |          |                  | Formula 2 |                |          |                  | Formula 3 |                |          | G+C difference   |
| Query genome                 | Reference genome               | DDH       | Model C.I.     | Distance | Prob. DDH >= 70% | DDH       | Model C.I.     | Distance | Prob. DDH >= 70% | DDH       | Model C.I.     | Distance | Prob. DDH >= 70% |
| Bombella_sp_ESL0378          | Bombella_apis_30666T           | 20.6      | [17.4 - 24.2%] | 0.6961   | 0                | 18.6      | [16.5 - 21%]   | 0.2358   | 0                | 19.5      | [16.8 - 22.5%] | 0.7678   | 0                |
| Bombella_sp_ESL0378          | Bombella_intestini_R52487      | 21.6      | [18.4 - 25.2%] | 0.6707   | 0                | 18.9      | [16.7 - 21.3%] | 0.2327   | 0                | 20.3      | [17.5 - 23.3%] | 0.7473   | 0                |
| Bombella_sp_ESL0378          | Bombella_sp_nov_TMW21880       | 22.3      | [19 - 25.9%]   | 0.6549   | 0                | 18.9      | [16.7 - 21.3%] | 0.2328   | 0                | 20.8      | [18 - 23.8%]   | 0.7353   | 0                |
| Bombella_sp_ESL0378          | Bombella_sp_nov_TMW21889       | 20.3      | [17.1 - 23.9%] | 0.7032   | 0                | 18.6      | [16.4 - 20.9%] | 0.2368   | 0                | 19.3      | [16.6 - 22.3%] | 0.7735   | 0                |
| Bombella_sp_ESL0378          | Parasaccharibacter_apium_AS1   | 95.8      | [93.8 - 97.2%] | 0.0458   | 98.83            | 47.3      | [44.8 - 49.9%] | 0.0781   | 12.57            | 88.3      | [85.4 - 90.7%] | 0.1203   | 99.15            |
|                              |                                | Formula 1 |                |          |                  | Formula 2 |                |          |                  | Formula 3 |                |          | G+C difference   |
| Query genome                 | Reference genome               | DDH       | Model C.I.     | Distance | Prob. DDH >= 70% | DDH       | Model C.I.     | Distance | Prob. DDH >= 70% | DDH       | Model C.I.     | Distance | Prob. DDH >= 70% |
| Parasaccharibacter_apium_AS1 | Bombella_apis_30666T           | 20.8      | [17.6 - 24.4%] | 0.6902   | 0                | 18.5      | [16.4 - 20.9%] | 0.2372   | 0                | 19.6      | [16.9 - 22.7%] | 0.7637   | 0                |
| Parasaccharibacter_apium_AS1 | Bombella_intestini_R52487      | 21.8      | [18.6 - 25.5%] | 0.6657   | 0                | 18.8      | [16.7 - 21.2%] | 0.2336   | 0                | 20.4      | [17.7 - 23.5%] | 0.7438   | 0                |
| Parasaccharibacter_apium_AS1 | Bombella_sp_ESL0378            | 95.8      | [93.8 - 97.2%] | 0.0458   | 98.83            | 47.3      | [44.8 - 49.9%] | 0.0781   | 12.57            | 88.3      | [85.4 - 90.7%] | 0.1203   | 99.15            |
| Parasaccharibacter_apium_AS1 | Bombella_sp_ESL0385            | 95.3      | [93.1 - 96.9%] | 0.0491   | 98.74            | 47.4      | [44.8 - 50%]   | 0.078    | 12.69            | 87.8      | [84.9 - 90.3%] | 0.1233   | 99.06            |
| Parasaccharibacter_apium_AS1 | Bombella_sp_nov_TMW21880       | 22.3      | [19.1 - 26%]   | 0.6535   | 0                | 18.9      | [16.7 - 21.3%] | 0.2326   | 0                | 20.8      | [18.1 - 23.9%] | 0.7341   | 0                |
| Parasaccharibacter_apium_AS1 | Bombella_sp_nov_TMW21889       | 20.3      | [17.1 - 23.9%] | 0.7039   | 0                | 18.5      | [16.3 - 20.8%] | 0.238    | 0                | 19.2      | [16.5 - 22.3%] | 0.7744   | 0                |
|                              |                                | Formula 1 |                |          |                  | Formula 2 |                |          |                  | Formula 3 |                |          | G+C difference   |
| Query genome                 | Reference genome               | DDH       | Model C.I.     | Distance | Prob. DDH >= 70% | DDH       | Model C.I.     | Distance | Prob. DDH >= 70% | DDH       | Model C.I.     | Distance | Prob. DDH >= 70% |
| Bombella_sp_ESL0378          | Bombella_sp_ESL0385            | 98.3      | [97.1 - 99%]   | 0.0264   | 99.27            | 91.8      | [89.6 - 93.5%] | 0.0102   | 96.35            | 98.6      | [97.7 - 99.1%] | 0.0363   | 99.95            |
